# Supplementary material for: The role of intermolecular interactions in [Fe(X-salEen)2]ClO4 spin crossover complexes
Source: Royal Society of Chemistry journal article supplement (doi:10.1039/d4dt00400k), 2024-01-01
Supplement: d4dt00400k1.pdf [file d4dt00400k1.pdf]

## Supporting Information for

# The role of intermolecular interactions in [Fe(X-salEen)<sub>2</sub>]ClO<sub>4</sub> spin crossover complexes

Marcos A. Bento,<sup>1</sup> Tiago Gomes,<sup>1</sup> Frederico F. Martins,<sup>2</sup> Adrià Gil,<sup>2,3</sup> Liliana P. Ferreira,<sup>4,5</sup> Sónia Barroso,<sup>6,7§</sup> Clara S. B. Gomes,<sup>8</sup> Yann Garcia,<sup>9</sup> Paulo N. Martinho<sup>1\*</sup>

<sup>1</sup> Centro de Química Estrutural, Institute of Molecular Sciences, Departamento de Química e Bioquímica, Faculdade de Ciências, Universidade de Lisboa, Campo Grande, 1749-016 Lisboa, Portugal

<sup>2</sup> BioISI - Biosystems & Integrative Sciences Institute, Faculdade de Ciências, Universidade de Lisboa, Campo Grande, 1749-016 Lisboa, Portugal

<sup>3</sup> Departament de Química, Física i Ciències Ambientals i del Sòl, ETSEA – Escola Tècnica Superior d'Enginyeria Agrària, Universitat de Lleida, Av. de l'alcalde Rovira Roure, 191, E25198, Lleida, Catalunya, Spain

<sup>4</sup> Department of Physics, University of Coimbra, 3004-516 Coimbra, Portugal

<sup>5</sup> Centro de Física Teórica e Computacional, Faculdade de Ciências, Universidade de Lisboa, Campo Grande, Edifício C8, 1749-016 Lisboa, Portugal

<sup>6</sup> UCIBIO, Departamento de Química, Faculdade de Ciências e Tecnologia, Universidade NOVA de Lisboa, 2829-516 Caparica, Portugal

<sup>7</sup> i4HB, Faculdade de Ciências e Tecnologia, Universidade NOVA de Lisboa, 2829-516 Caparica, Portugal

<sup>8</sup> LAQV-REQUIMTE, Department of Chemistry, NOVA School of Science and Technology, NOVA University of Lisbon, 2829-516 Caparica, Portugal

<sup>9</sup> Institute of Condensed Matter and Nanosciences, Molecular Chemistry, Materials and Catalysis (IMCN/MOST), Université Catholique de Louvain, Place L. Pasteur 1, 1348 Louvain-la-Neuve, Belgium

§ Current address: MARE - Marine and Environmental Sciences Centre / ARNET - Aquatic Research Network, Polytechnic of Leiria, Cetemares, 2520-620 Peniche, Portugal

## 1. FTIR Spectroscopy

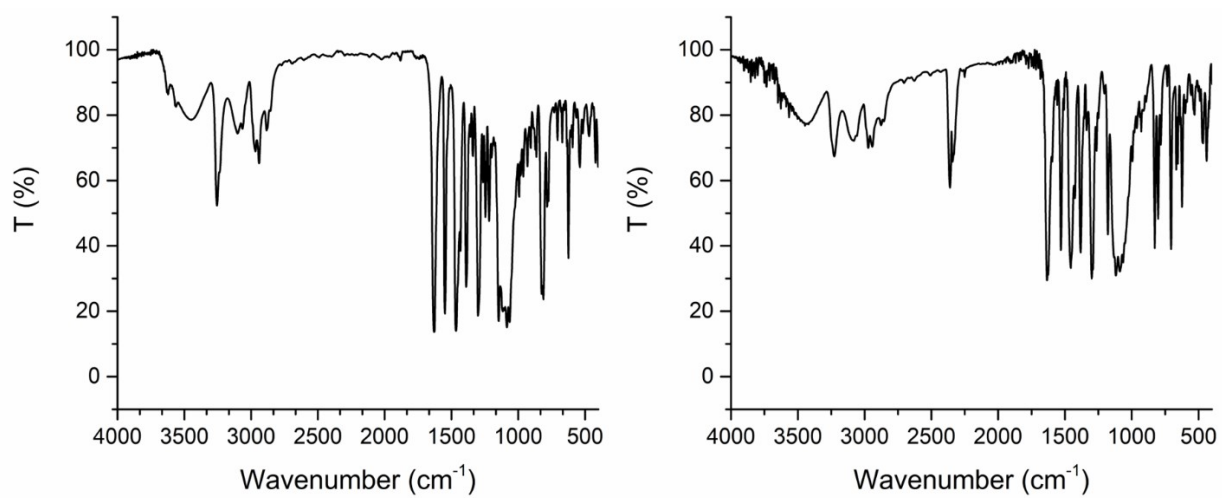

Figure S1. FTIR spectrum of **1** (left) and **2** (right) in KBr

## 2. X-ray diffraction

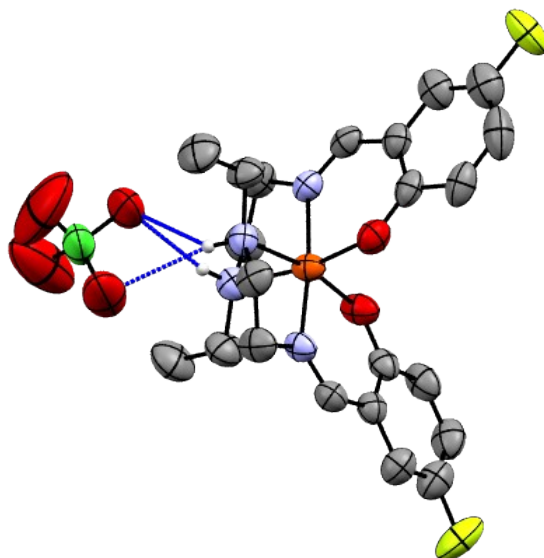

Figure S2. ORTEP view of compound **1** at 300 K, represented with 50% probability level ellipsoids. All hydrogen atoms, with exception of those involved in hydrogen bonding with the anion, were omitted for clarity. Atom colours: Carbon: grey, hydrogen: white, nitrogen: blue, oxygen: red, chlorine green, fluorine: yellow, iron: orange. N–H...O hydrogen bonds represented in blue dashed lines.

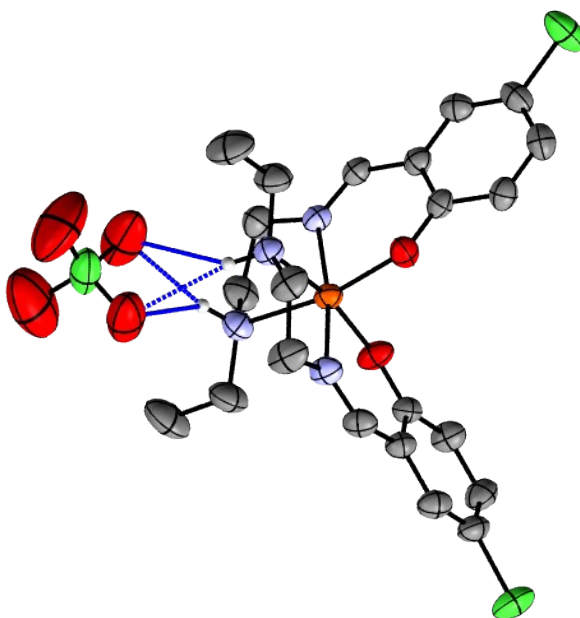

Figure S3. ORTEP view of compound **2** at 300 K, represented with 50% probability level ellipsoids. All hydrogen atoms with exception of those involved in hydrogen bonding with the anion, were omitted for clarity. Atom colours: Carbon: grey, hydrogen: white, nitrogen: blue, oxygen: red, chlorine green, fluorine: yellow, iron: orange. N–H...O hydrogen bonds represented in blue dashed lines.

Table S1. Selected angles for **1**, **1-110K**, **2** and **2-110K** [°].

|                    | <b>1</b>   | <b>1-110K</b> | <b>2</b>  | <b>2-110K</b> |
|--------------------|------------|---------------|-----------|---------------|
| <i>bond angles</i> |            |               |           |               |
| N1–Fe1–N3          | 174.13(13) | 178.61(9)     | 171.75(8) | 178.17(8)     |
| O1–Fe1–N2          | 168.29(14) | 175.86(9)     | 165.30(9) | 177.48(7)     |
| O2–Fe1–N4          | 167.49(13) | 177.43(8)     | 165.55(9) | 176.41(7)     |
| N1–Fe1–O2          | 95.67(13)  | 86.01(8)      | 97.60(9)  | 88.23(7)      |
| N3–Fe1–O2          | 89.18(13)  | 93.59(8)      | 87.15(8)  | 93.59(7)      |
| N1–Fe1–N4          | 95.81(13)  | 96.45(9)      | 96.51(10) | 94.96(8)      |
| N3–Fe1–N4          | 79.09(13)  | 83.93(9)      | 78.48(9)  | 83.22(8)      |

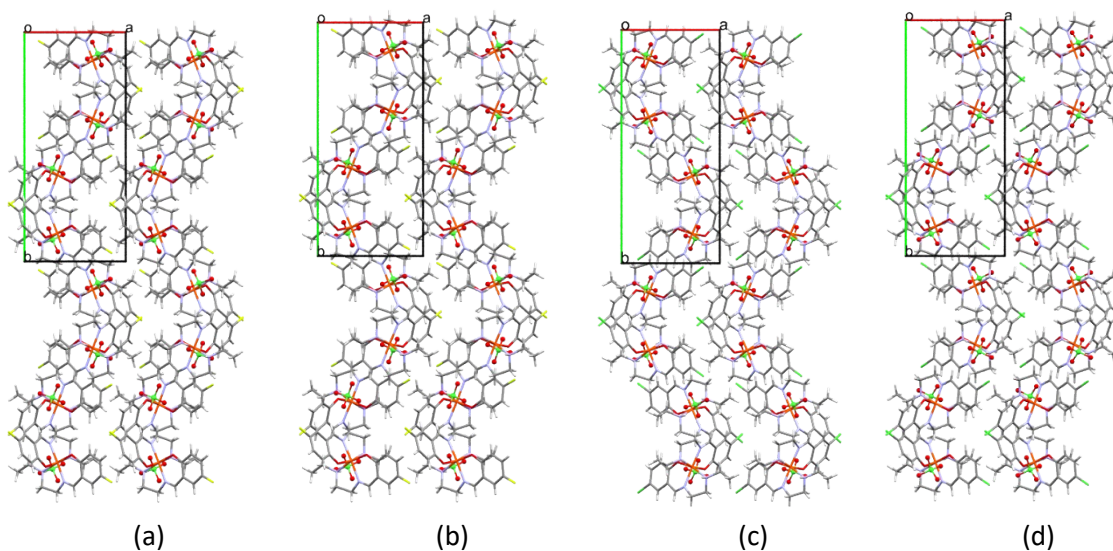

Figure S4. Supramolecular arrangement in complexes (a) **1**, (b) **1-110K**, (c) **2** and (d) **2-110K**, viewed along the *c* axis. The Fe(III) cations and the ClO<sub>4</sub><sup>-</sup> anions are represented in capped sticks and ball and stick styles, respectively.

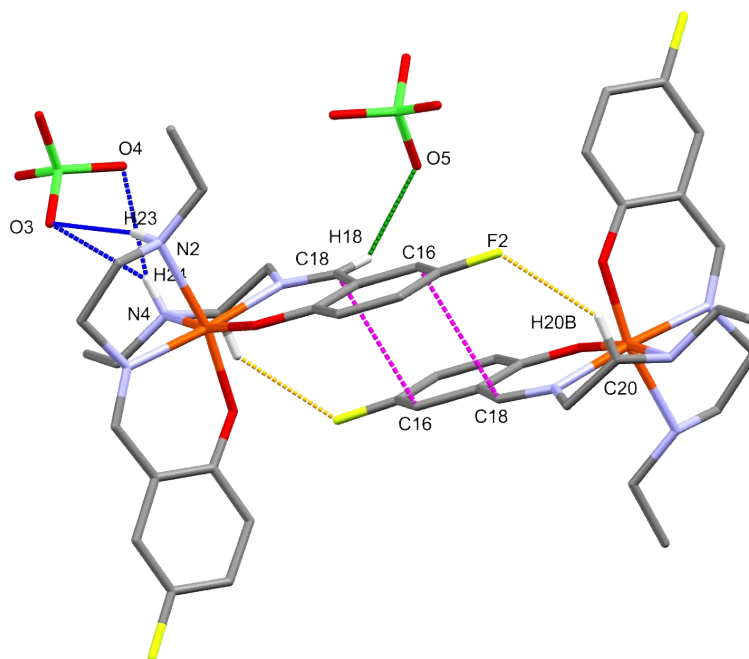

Figure S5. Intermolecular interactions observed in the crystal packing of complex **1** at 300 K: classical H-bonds [N–H...O (blue)], non-classical H-bonds [C–H...O (green)], halogen bonds [C–H...F (orange)], and  $\pi$ ... $\pi$  (magenta) bonds, represented as dashed lines.

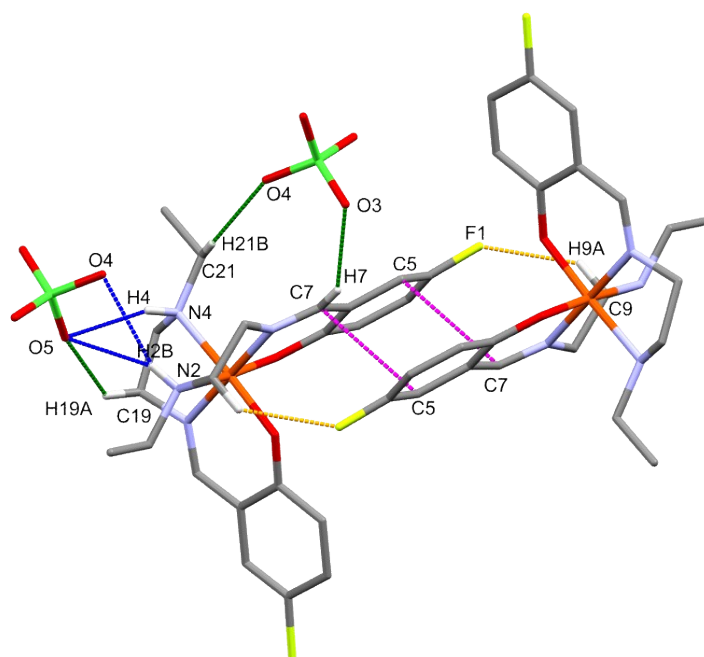

Figure S6. Intermolecular interactions observed in the crystal packing of complex **1** at 110 K: classical H-bonds [N–H...O (blue)], non-classical H-bonds [C–H...O (green)], halogen bonds [C–H...F (orange)], and  $\pi$ ... $\pi$  (magenta) bonds, represented as dashed lines.

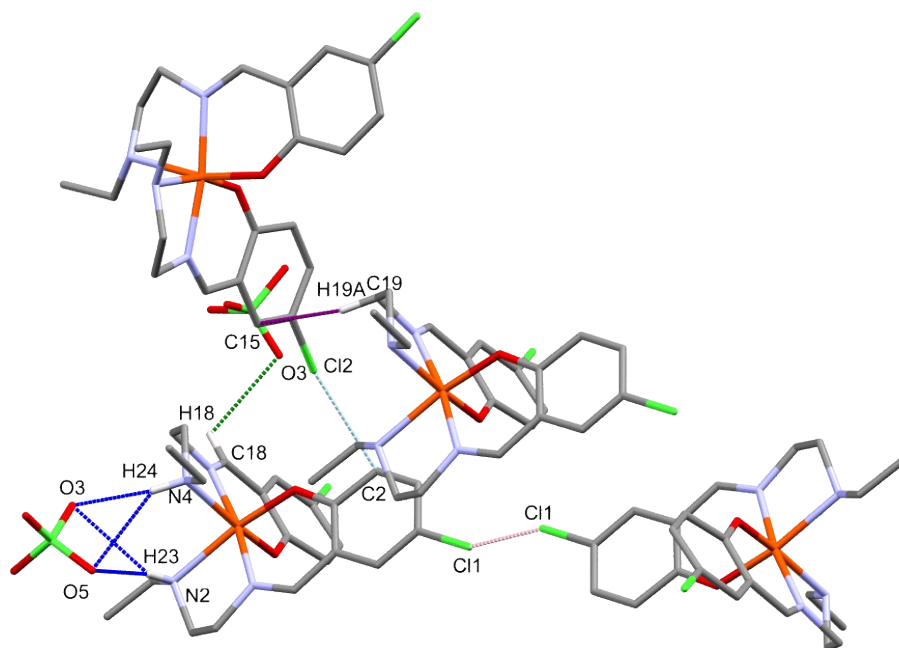

Figure S7. Intermolecular interactions observed in the crystal packing of complex **2** at 300 K: classical H-bonds [N–H...O (blue)], non-classical H-bonds [C–H...O (green)], and halogen bonds [ $\pi$ ...Cl (light blue), Cl...Cl (pink)], represented as dashed lines.

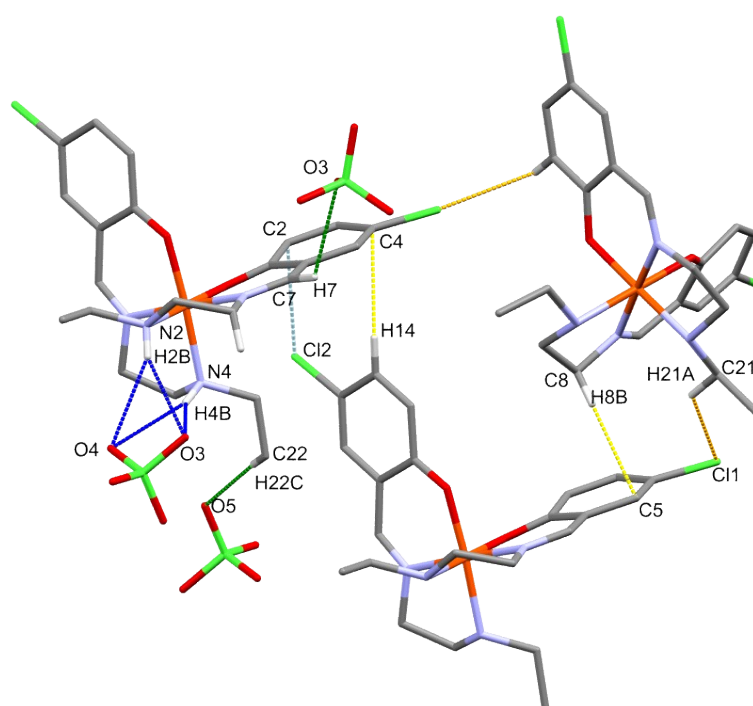

Figure S8. Intermolecular interactions observed in the crystal packing of complex **2** at 110 K: classical H-bonds [N–H...O (blue)], non-classical H-bonds [C–H...O (green)], and halogen bonds [ $\pi$ ...Cl (light blue), C–H...Cl (orange)], and C–H... $\pi$  (yellow), represented as dashed lines.

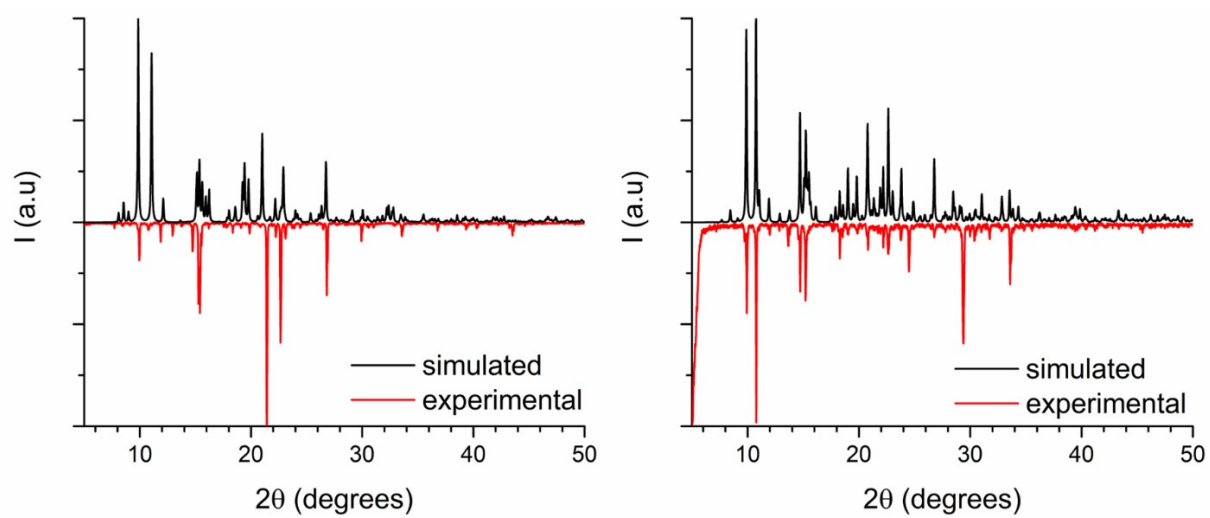

Figure S9. X-ray diffraction pattern of **1** (left) and **2** (right)

### 3. Hirshfeld Analysis

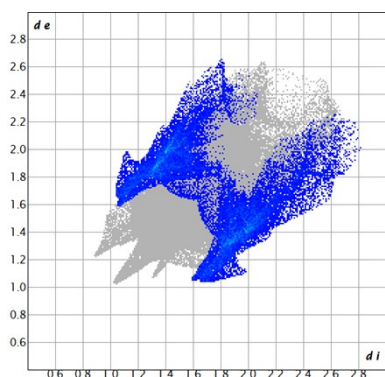

**1 (LS state)**  
***C...H/H...C* 19.7%**

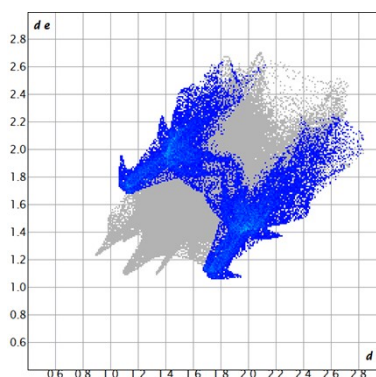

**1 (HS state)**  
***C...H/H...C* 19.1%**

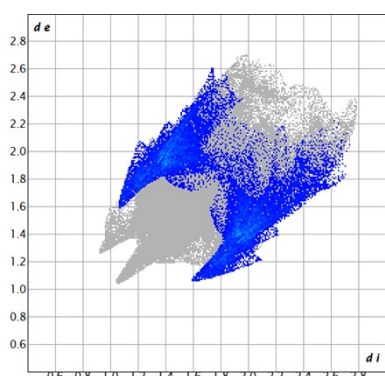

**2 (LS state)**  
***C...H/H...C* 17.8%**

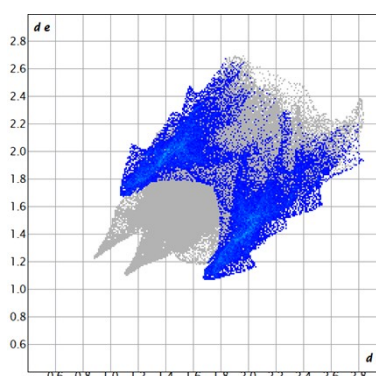

**2 (HS state)**  
***C...H/H...C* 18.1%**

Figure S10. Two-dimensional fingerprint plots for the  $H\cdots\pi$  ( $H\cdots C$ ) intermolecular interactions of the metal complexes **1** and **2** in the LS state, on the left, and HS state, on the right.

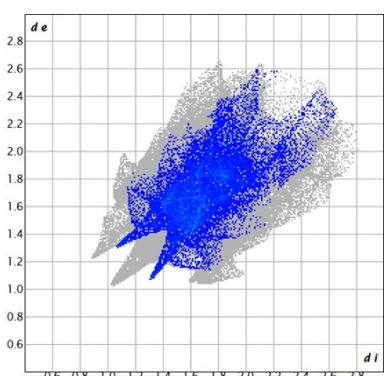

**1 (LS state)**  
***F...H/H...F* 17.2%**

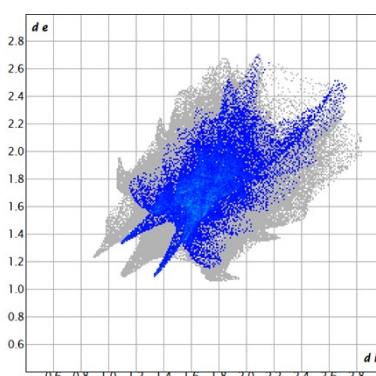

**1 (HS state)**  
***F...H/H...F* 16.2%**



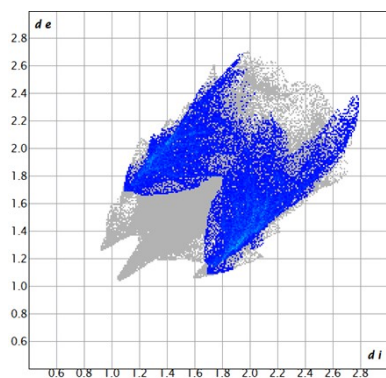

**2 (LS state)**

***Cl...H/H...Cl* 19.9%**

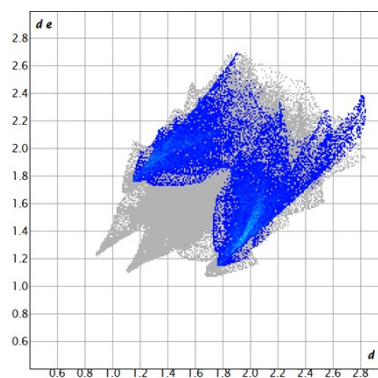

**2 (HS state)**

***Cl...H/H...Cl* 18.9%**

Figure S11. Two-dimensional fingerprint plots for the  $H\cdots X$  intermolecular interactions of the metal complexes **1** and **2** in the LS state, on the left, and HS state, on the right.

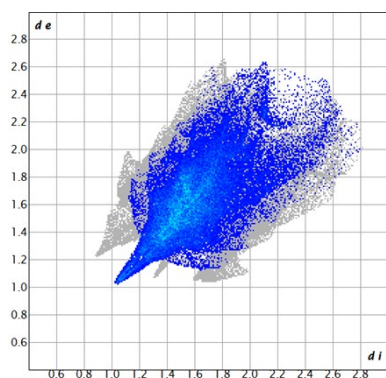

**1 (LS state)**

***H...H* 39.4%**

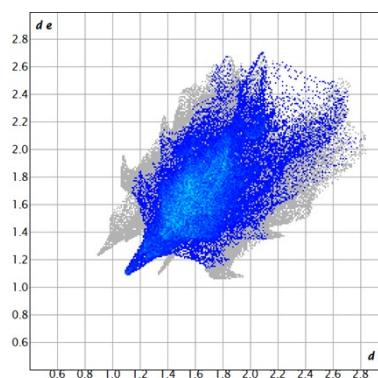

**1 (HS state)**

***H...H* 39.5%**

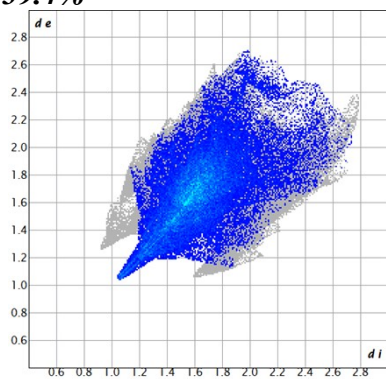

**2 (LS state)**

***H...H* 38.3%**

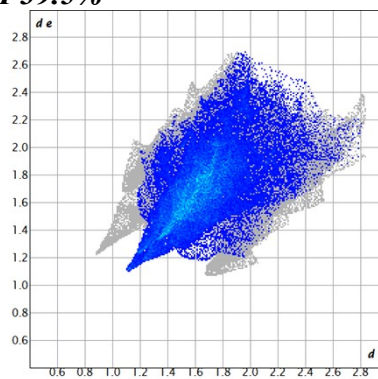

**2 (HS state)**

***H...H* 38.0%**

Figure S12. Two-dimensional fingerprint plots for the  $H\cdots H$  intermolecular interactions of the metal complexes **1** and **2** in the LS state, on the left, and HS state, on the right.

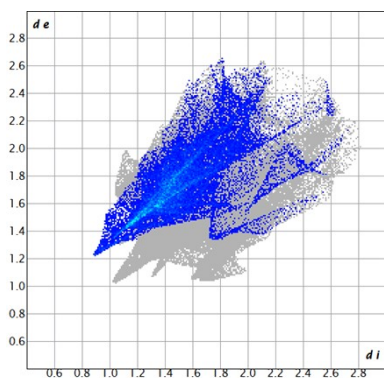

**1 (LS state)**

***O...H/H...O* 20.7%**

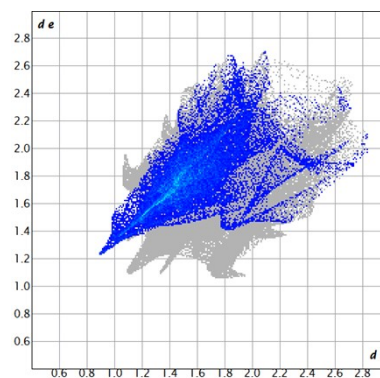

**1 (HS state)**

***O...H/H...O* 21.2%**

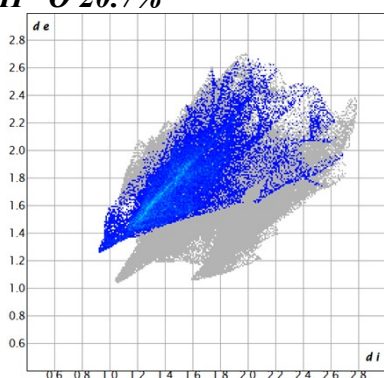

**2 (LS state)**

***O...H/H...O* 19.2%**

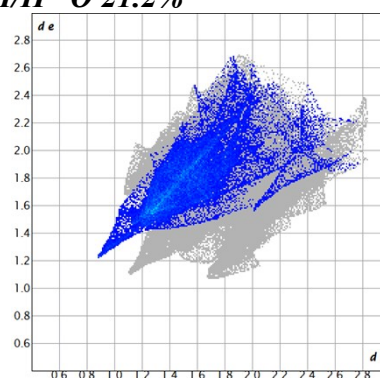

**2 (HS state)**

***O...H/H...O* 19.2%**

Figure S13 Two-dimensional fingerprint plots for the H...O intermolecular interactions of the metal complexes **1** and **2** in the LS state, on the left, and HS state, on the right.

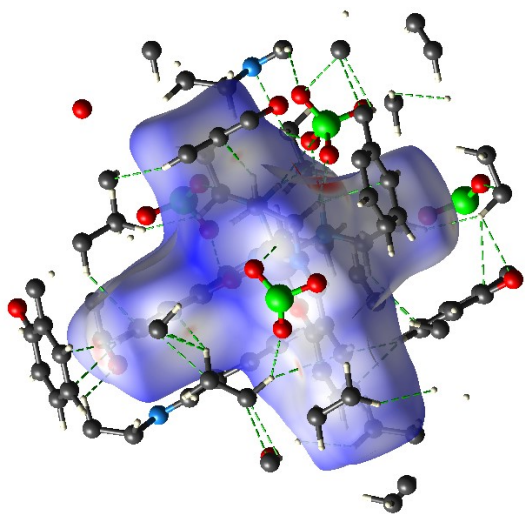

3 (100 K)

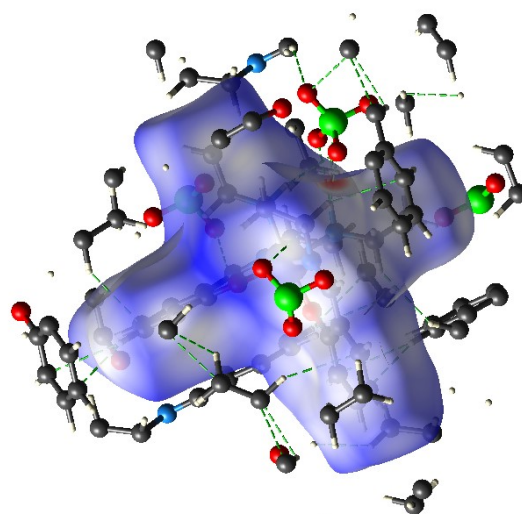

3 (300K)

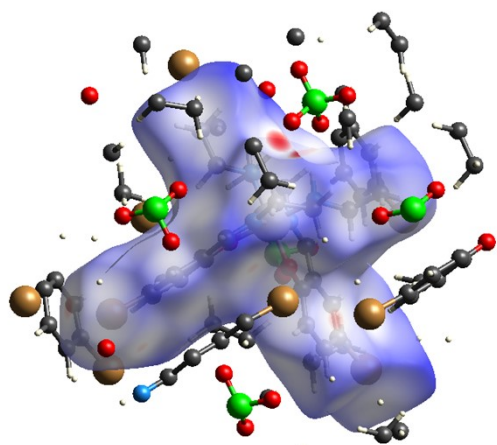

4a (150 K)

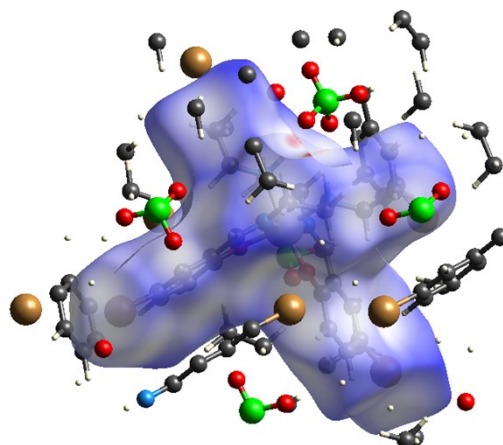

4a (300 K)

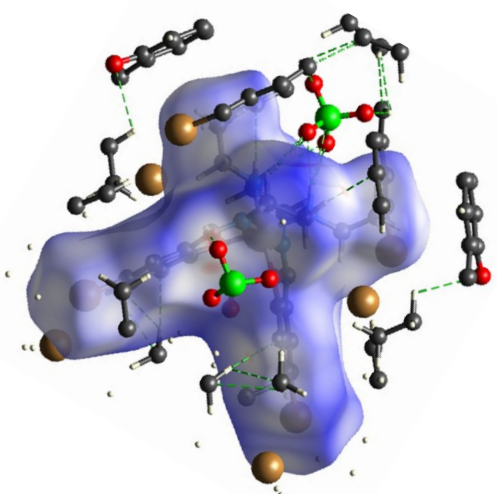

4b (110 K)

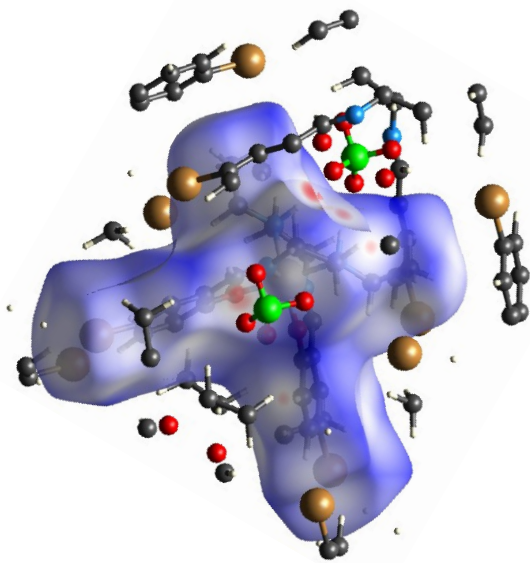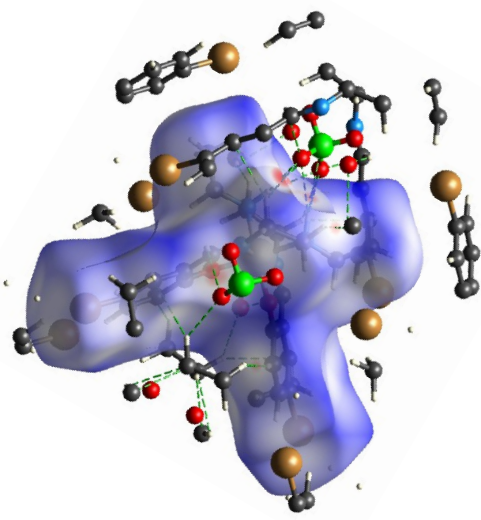

4b (300 K, cooling routine)

4b (300 K, heating routine)

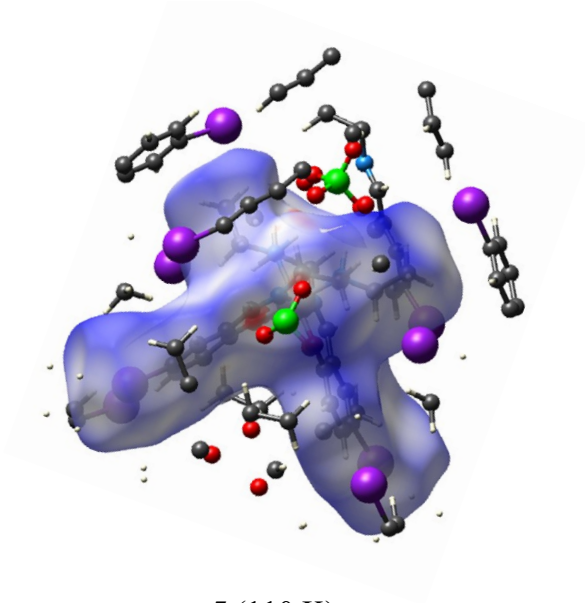

5 (110 K)



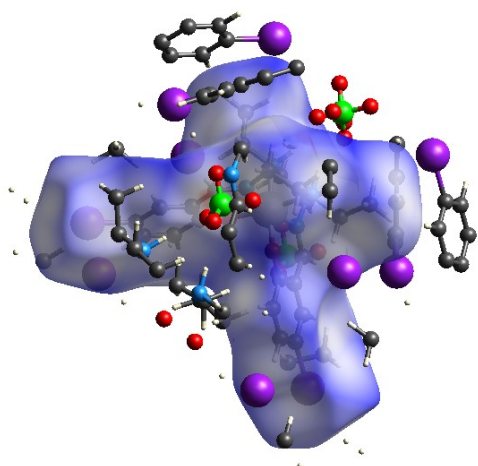

5 (350 K, heating routine)

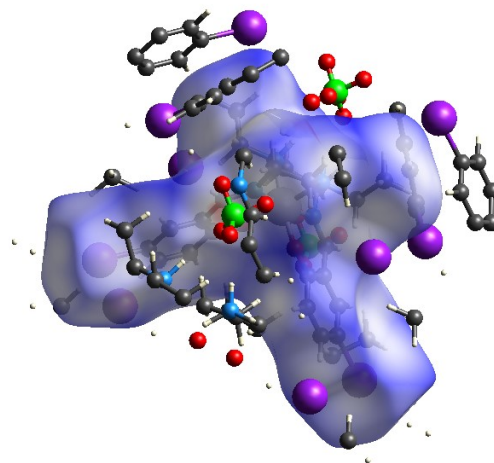

5 (350 K, cooling routine)

Figure S14. Hirshfeld surfaces within the crystal lattice for the metal complexes without substitution, the metal complexes containing Br and the metal complexes containing I excluding the  $\text{ClO}_4^-$  counterion from the surface. Low temperature or heating routines are depicted on left, whereas high temperatures or cooling routines are located on right. For these systems, the most strengthened intermolecular interactions are shown in red, which correspond to  $\text{H}\cdots\text{O}$ ,  $\text{H}\cdots\pi$ ,  $\text{H}\cdots\text{X}$  and  $\text{H}\cdots\text{H}$  interactions.

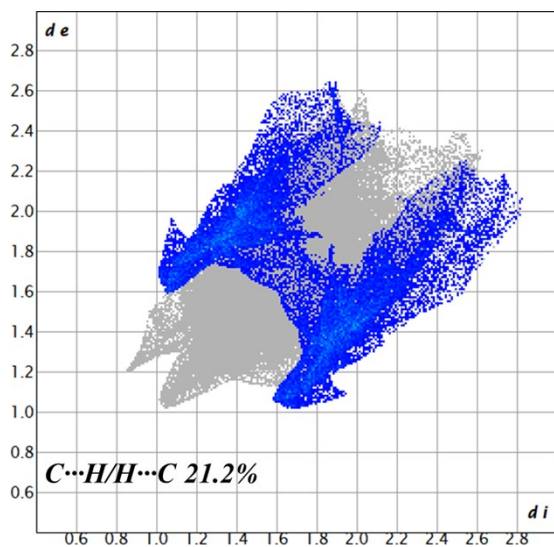

3 (100 K)

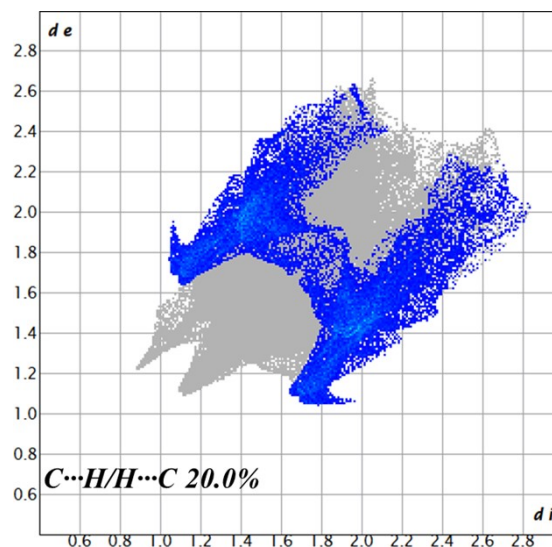

3 (300K)

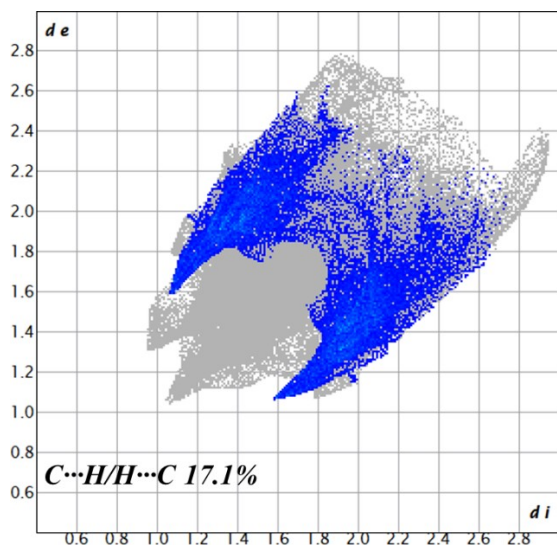

**4a (150 K)**

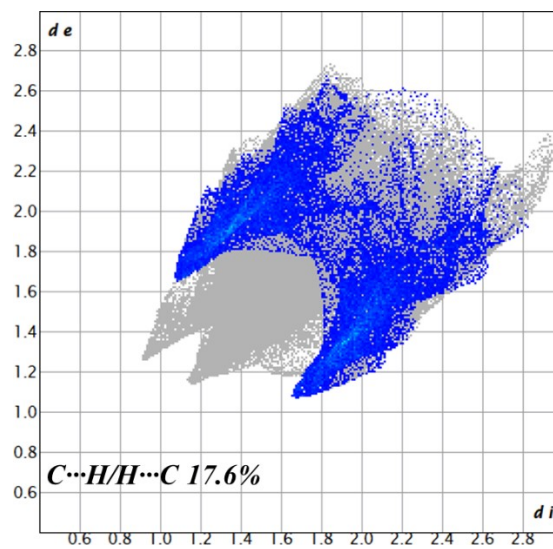

**4a (300 K)**

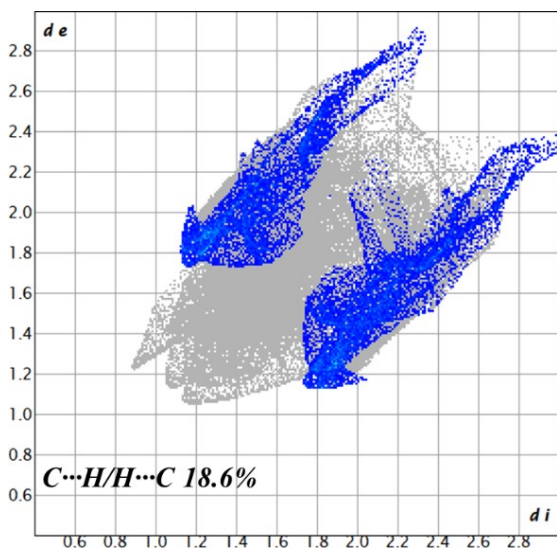

**4b (110 K)**

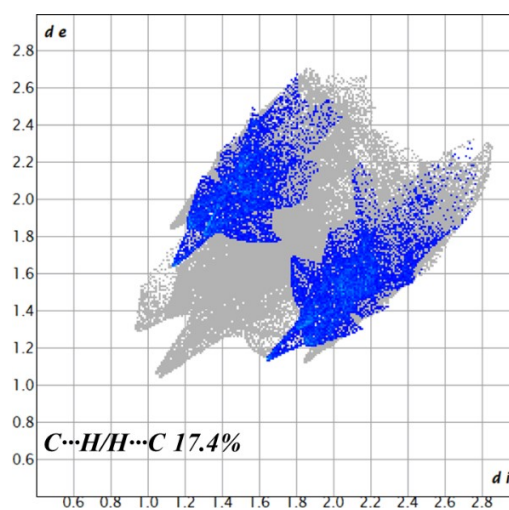

**4b (300 K, cooling routine)**

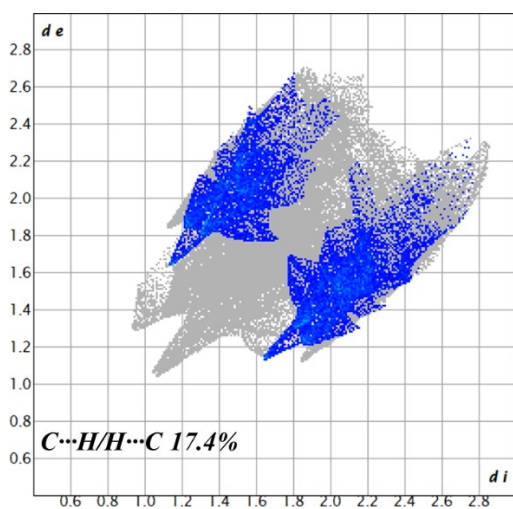

**4b (300 K, heating routine)**

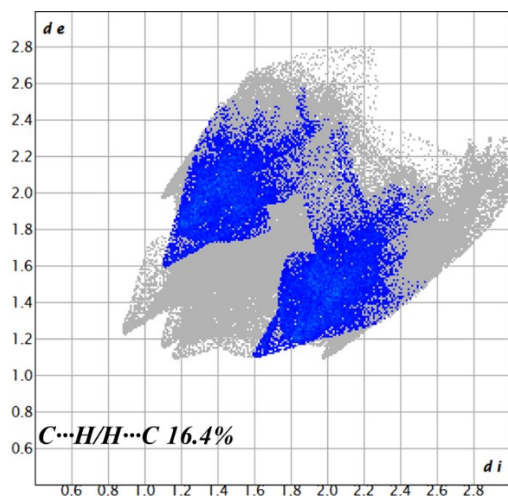

**5 (110 K)**

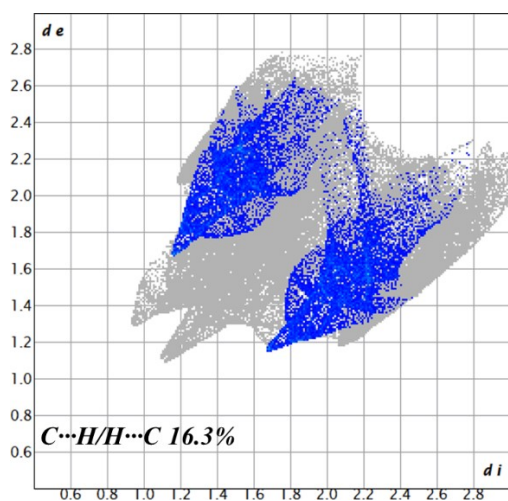

**5 (350 K, heating routine)**

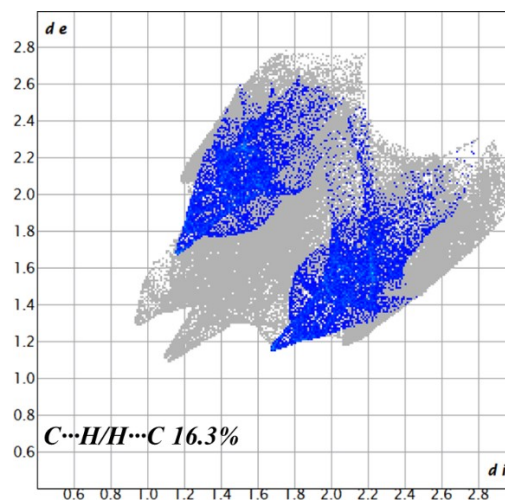

**5 (350 K, cooling routine)**

Figure S15. Two-dimensional fingerprint plots for the H $\cdots\pi$  (H $\cdots$ C) intermolecular interactions for the metal complexes without substitution, the metal complexes containing Br and the metal complexes containing I at low temperatures or heating routines on the left and high temperatures or cooling routines are on the right.

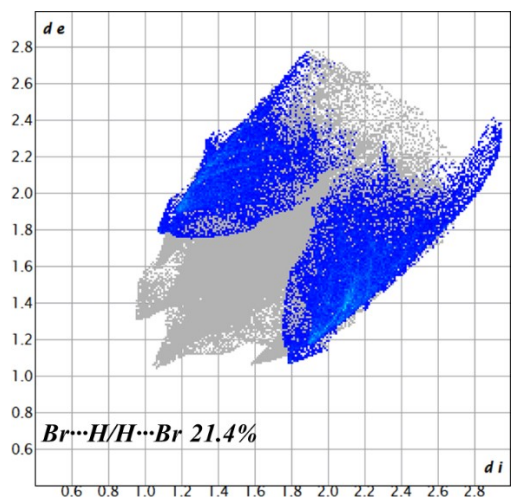

**4a (150 K)**

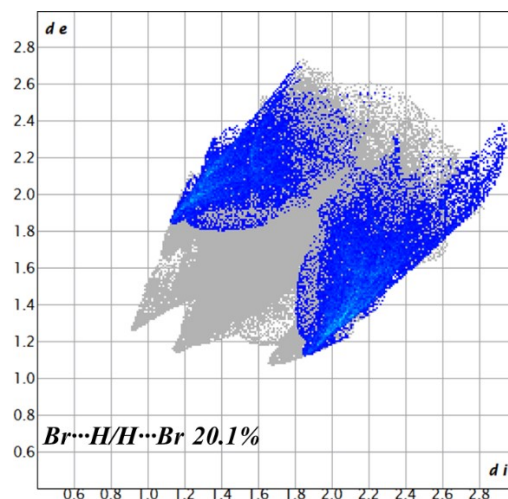

**4a (300 K)**

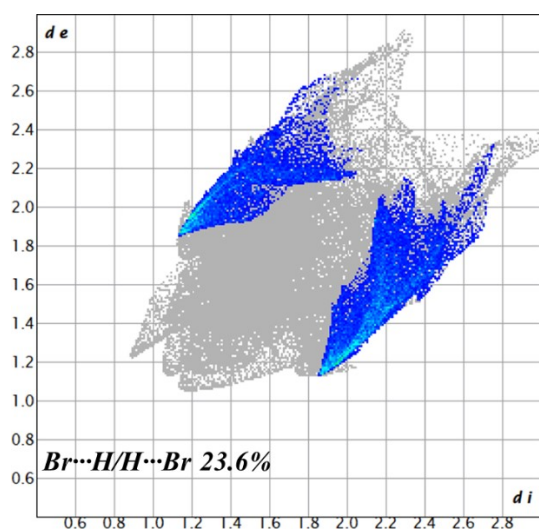

**4b (110 K)**

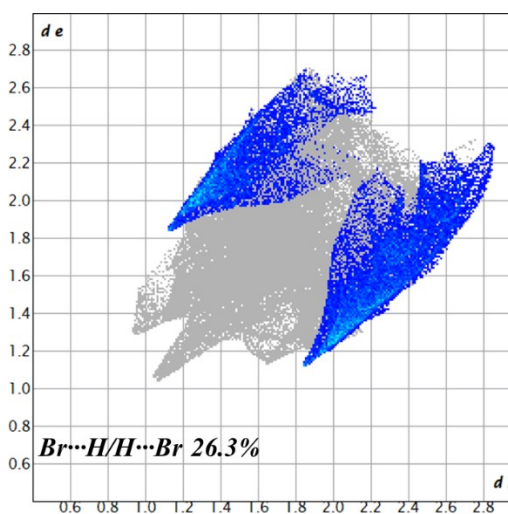

**4b (300 K, cooling routine)**

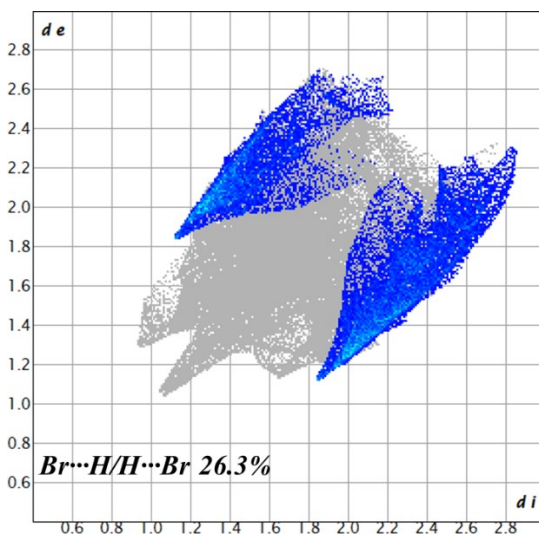

**4b (300 K, heating routine)**



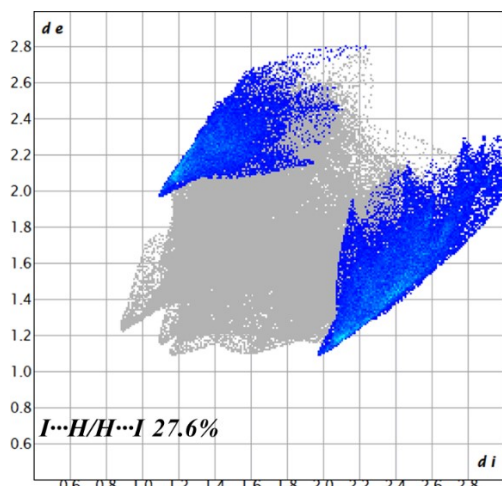

**5 (110 K)**

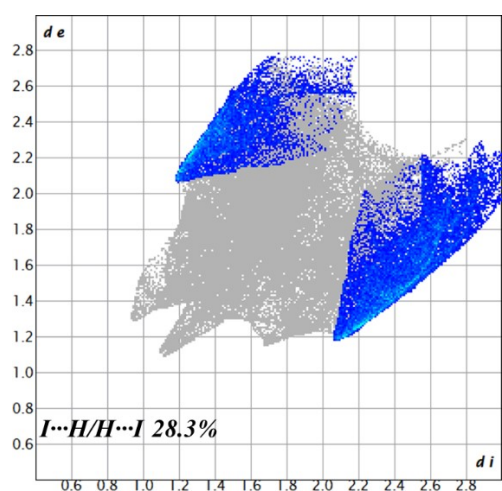

**5 (350 K, heating routine)**

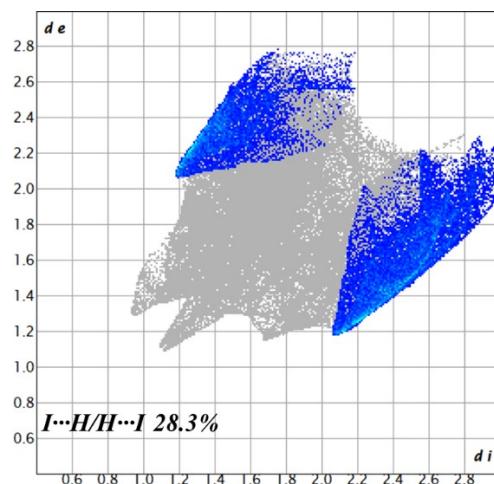

**5 (350 K, cooling routine)**

Figure S16. Two-dimensional fingerprint plots for the H $\cdots$ X intermolecular interactions for the metal complexes without substitution, the metal complexes containing Br and the metal complexes containing I at low temperatures or heating routines on the left and high temperatures or cooling routines are on the right.

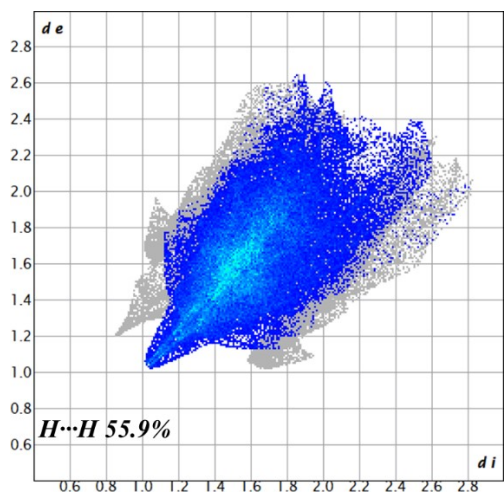

**3 (100 K)**

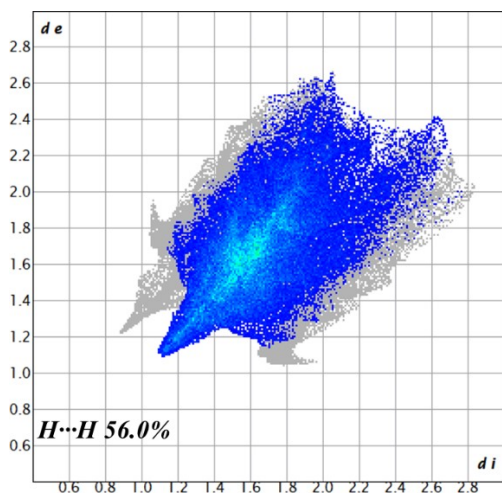

**3 (300K)**

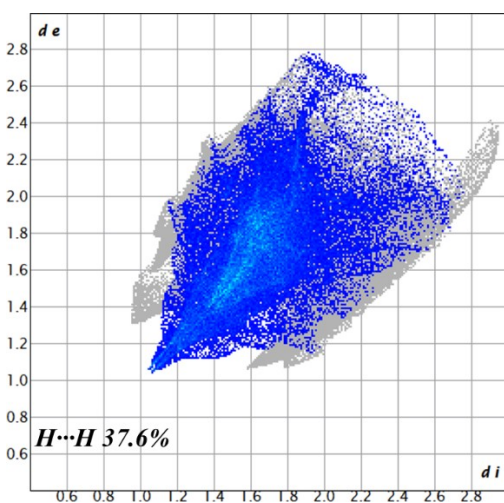

**4a (150 K)**

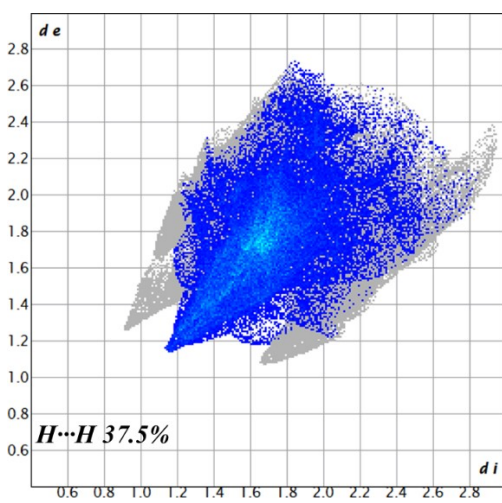

**4a (300 K)**

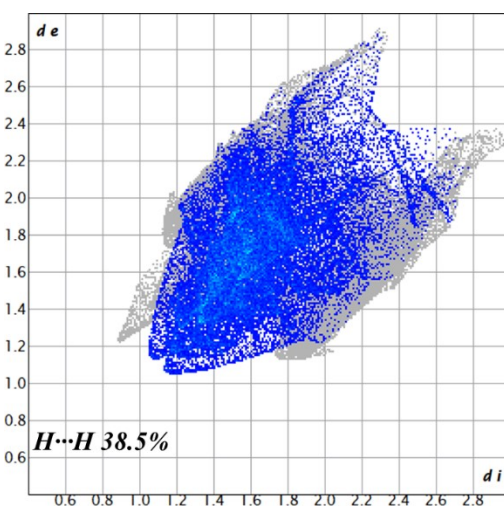

**4b (110 K)**

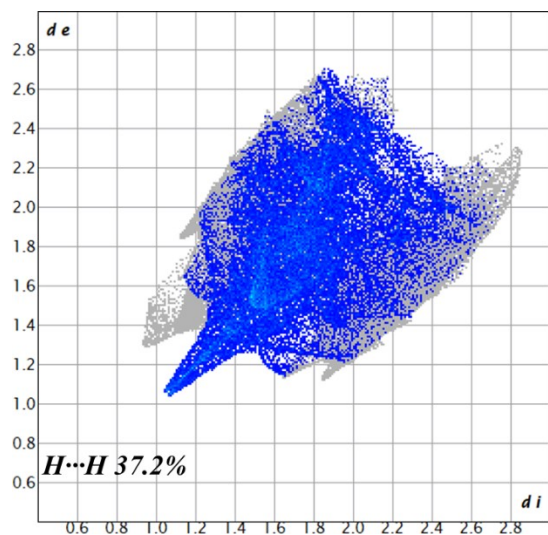

**4b** (300 K, heating routine)

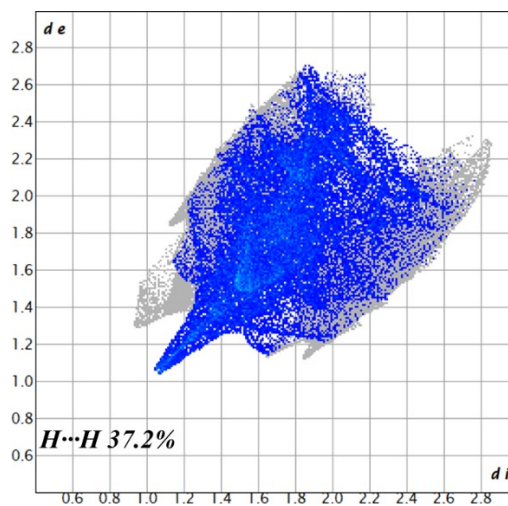

**4b** (300 K, cooling routine)

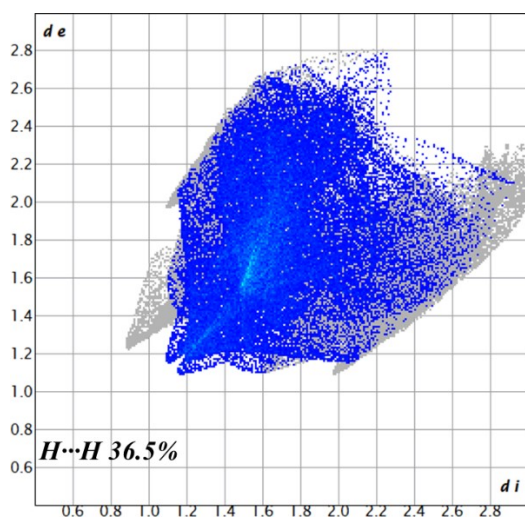

**5** (110 K)

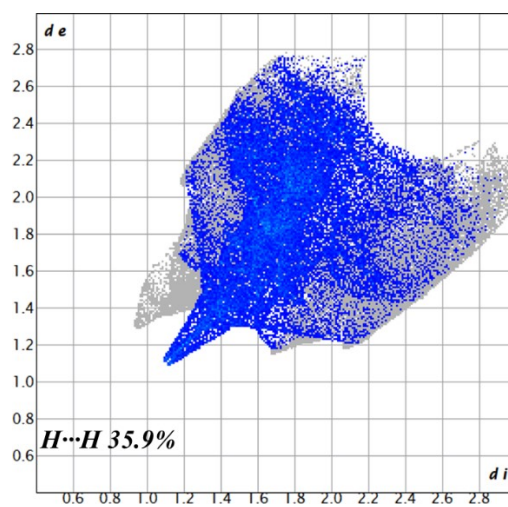

**5** (350 K, cooling routine)

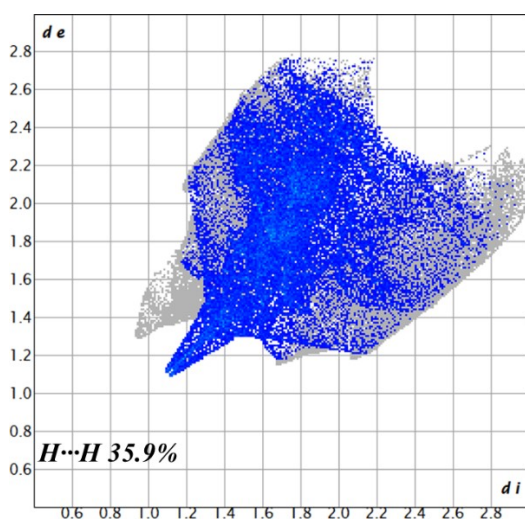

**5** (350 K, heating routine)

Figure S17. Two-dimensional fingerprint plots for the H...H intermolecular interactions for the metal complexes without substitution, the metal complexes containing Br and the metal

complexes containing I at low temperatures or heating routines on the left and high temperatures or cooling routines are on the right.

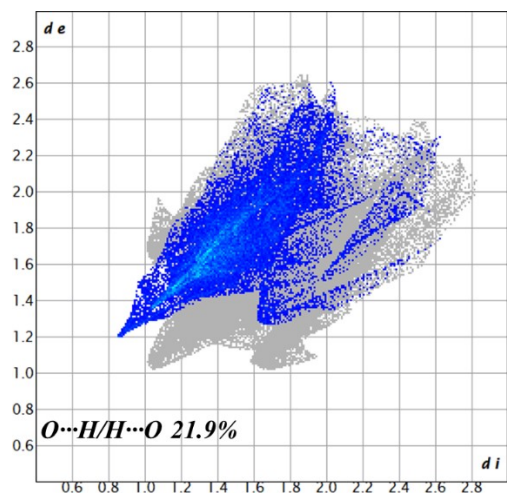

**3 (100 K)**

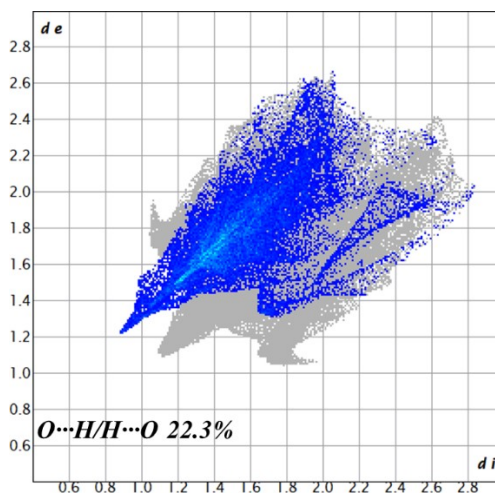

**3 (300K)**

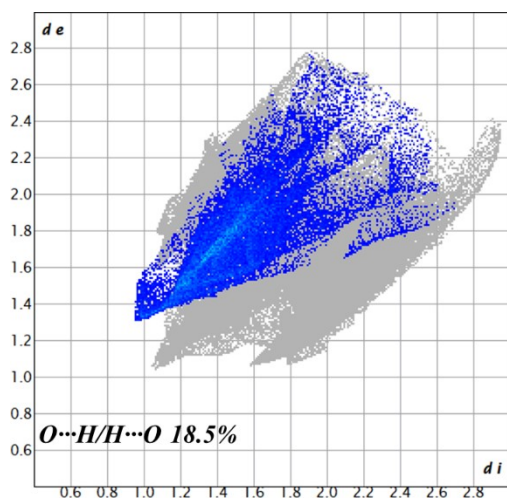

**4a (150 K)**

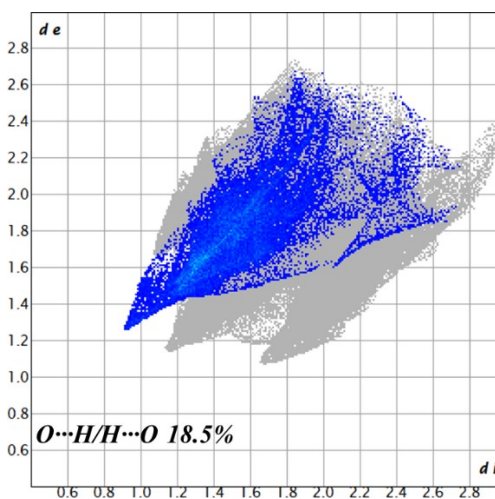

**4a (300 K)**

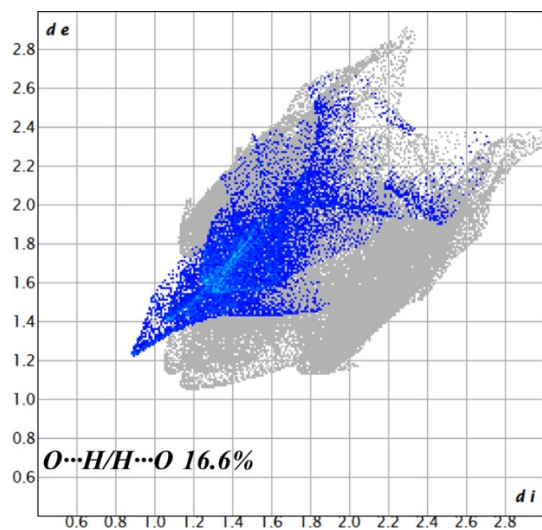



**4b (110 K)**

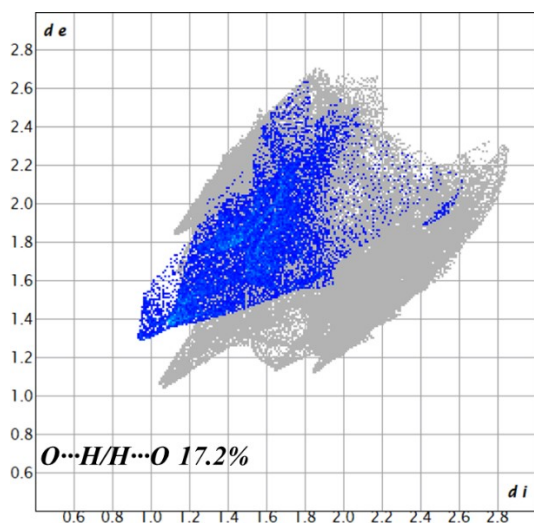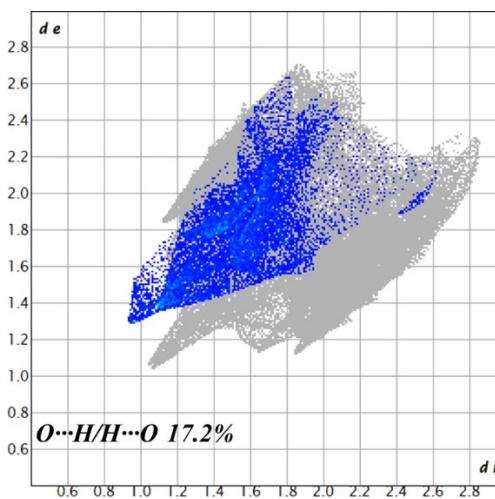

**4b (300 K, cooling routine)**

**4b (300 K, heating routine)**

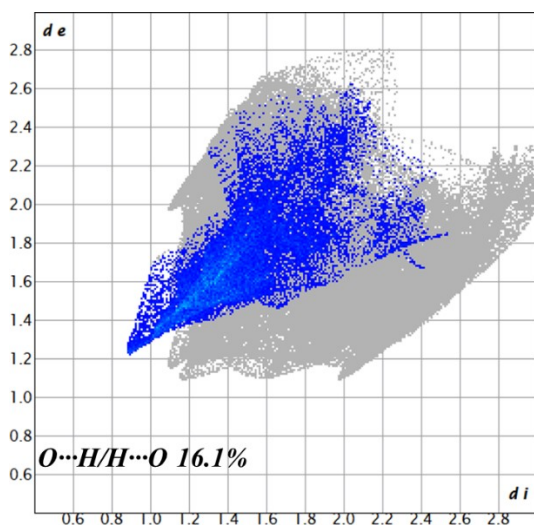

**5 (110 K)**

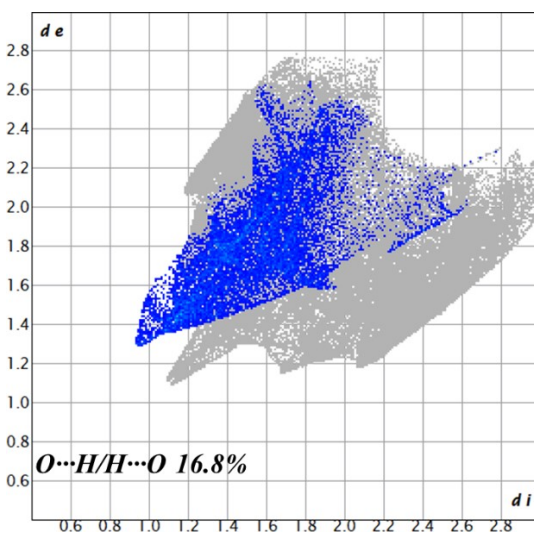

**5 (350 K, heating routine)**

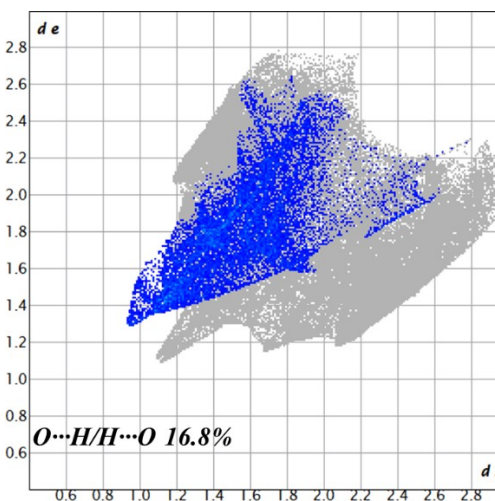

**5 (350 K, cooling routine)**

Figure S18. Two-dimensional fingerprint plots for the H $\cdots$ O intermolecular interactions for the metal complexes without substitution, the metal complexes containing Br and the metal complexes containing I at low temperatures or heating routines on the left and high temperatures or cooling routines are on the right.

#### 4. Magnetic and distortion parameters

Table S2.  $T_{1/2}$  (K) values for all the compounds studied (1-5).

| Compound | $T_{1/2}$ (K) |
|----------|---------------|
| 1        | 160*          |
| 2        | 195           |
| 3        | 215           |
| 4a       | 172           |
| 4b       | 300*          |
| 5        | 303*          |

\* Apparent  $T_{1/2}$  values that were calculated based on the maximum and minimum  $\chi_M T$  values obtained for the temperature range studied.

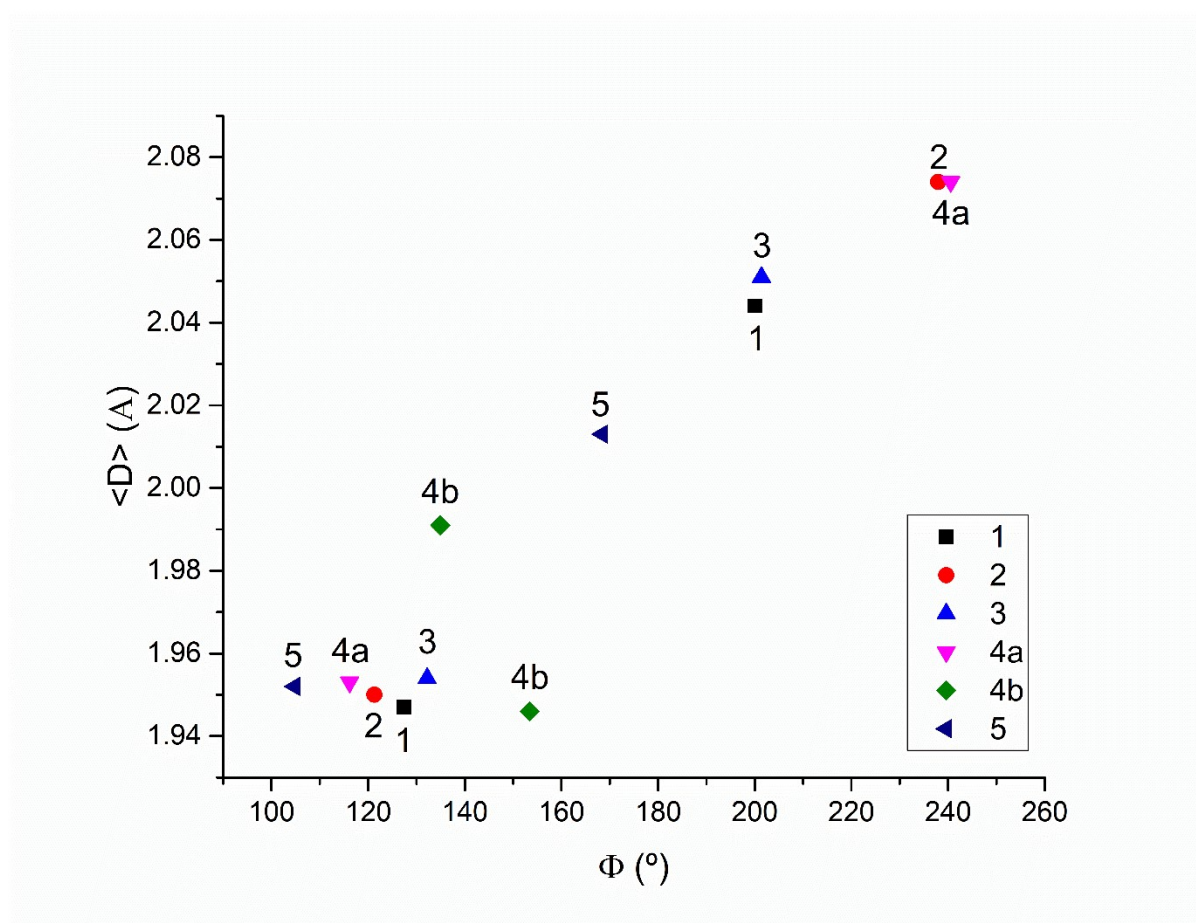

Figure S19.  $\langle D \rangle$  vs  $\Theta$  for compounds 1-5.
